# Supplementary figures and images for: Transcriptional dynamics uncover the role of BNIP3 in mitophagy during muscle remodeling in Drosophila
Source: eLife journal article supplement (doi:10.7554/elife.105834), 2025-03-12

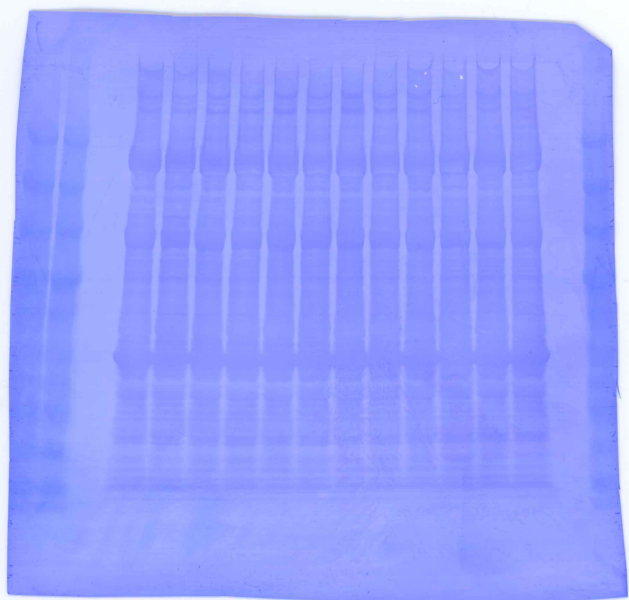

Supplement: fig5-data2 [file elife-105834-fig5-data2-v1.zip]
